# Supplementary material for: Effect of the Recombinant Human Epidermal Growth Factor Ointment on Cutaneous Surgical Wounds Compared to Antibiotic Ointment
Source: PubMed Central journal article supplement — Ann Dermatol. 2021 Nov 4;33(6):549–52. doi: 10.5021/ad.2021.33.6.549 (PMC8577910; doi:10.5021/ad.2021.33.6.549), 2021-11-04
Supplement: ad-33-549-s001.pdf [file ad-33-549-s001.pdf]

**Supplementary Table 1.** Exclusion criteria

| Exclusion criteria                                                                                                                                                                                                 |
|--------------------------------------------------------------------------------------------------------------------------------------------------------------------------------------------------------------------|
| 1. Patients who had undergone excision operation due to malignant skin neoplasm (because the lesions tend to have more extensive resection and the wounds were often closed with flaps rather than simple closure) |
| 2. Those who had evidence of skin disease or infection signs near surgical wounds                                                                                                                                  |
| 3. Those who were administered systemic steroids or antibiotics within two weeks prior to screening or were planning to use them during research period                                                            |
| 4. Those who had used topical agents such as topical corticosteroids on surgical sites within four weeks prior to screening                                                                                        |
| 5. Those who had previous scars on the excision site; those who had a history of hypertrophic scars or keloids and allergic reaction with topical agents or dressing materials                                     |
| 6. Those whose resection sites were closed by means other than skin suture                                                                                                                                         |
