# Supplementary material for: Effect of the Recombinant Human Epidermal Growth Factor Ointment on Cutaneous Surgical Wounds Compared to Antibiotic Ointment
Source: PubMed Central journal article supplement — Ann Dermatol. 2021 Nov 4;33(6):549–52. doi: 10.5021/ad.2021.33.6.549 (PMC8577910; doi:10.5021/ad.2021.33.6.549), 2021-11-04
Supplement: ad-33-549-s002.pdf [file ad-33-549-s002.pdf]

**Supplementary Table 2.** Number and ratio of resection sites and pathologic diagnosis

| Variable                | Number (%) |
|-------------------------|------------|
| Site of lesions         |            |
| Face & neck             | 4 (20.0)   |
| Scalp                   | 1 (5.0)    |
| Upper extremity         | 4 (20.0)   |
| Lower extremity         | 4 (20.0)   |
| Trunk                   | 7 (35.0)   |
| Total                   | 20 pairs   |
| Pathologic diagnosis    |            |
| Neurofibroma            | 13 (32.5)  |
| Dermatofibroma          | 8 (20.0)   |
| Epidermal cyst          | 5 (12.5)   |
| Lipoma                  | 4 (10.0)   |
| Intradermal nevus       | 3 (7.5)    |
| Blue nevus              | 2 (5.0)    |
| Pilomatricoma           | 2 (5.0)    |
| Steatocystoma multiplex | 2 (5.0)    |
| Seborrheic keratosis    | 1 (2.5)    |
| Total                   | 40 (100)   |

Among the resection sites, trunk were the most common (7 pairs), followed by face and neck, upper extremity, lower extremity, and scalp. In pathologic diagnosis, neurofibroma were the most common (13) diagnosis.
